# Supplementary material
Source: PubMed Central journal article supplement (PMC2956946)
Supplement: tjp0588-3075-SD1.pdf [file tjp0588-3075-SD1.pdf]

Distribution of the animals with and without phrenic long-term facilitation

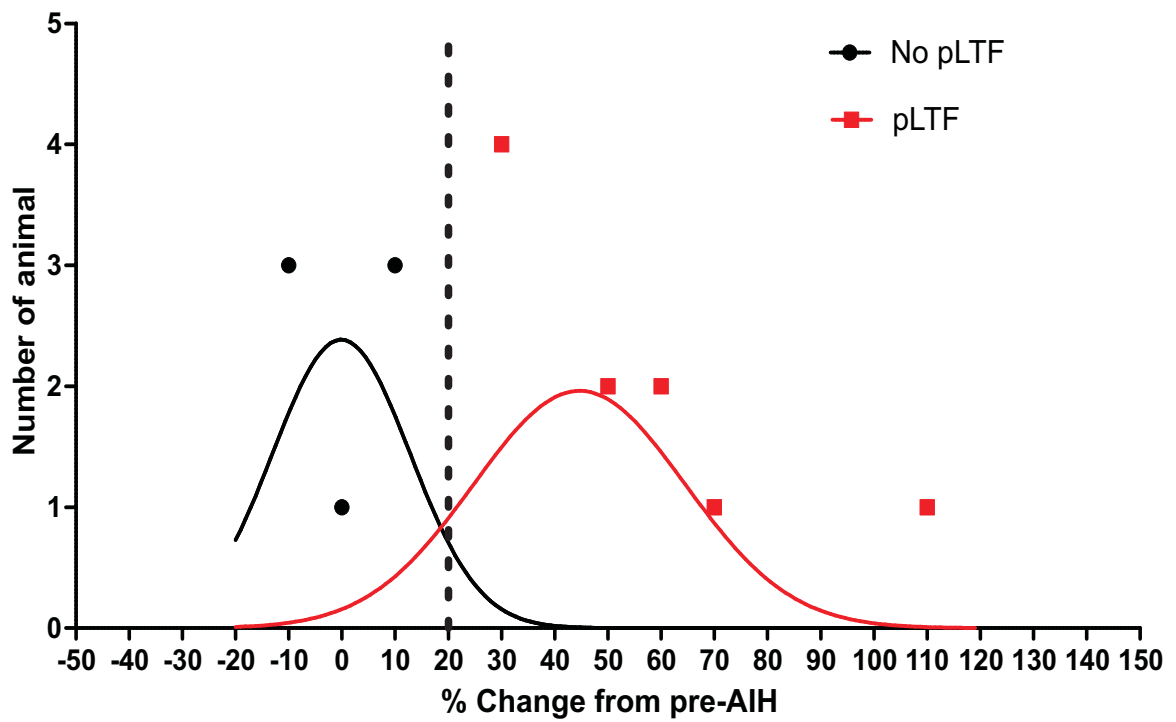

Supplementary figure
